# Supplementary material
Source: Springer Nature journal article supplement (https://www.springermedizin.de/resource/supplementary/12889_2011_3814_MOESM2_ESM.pdf/9492084)
Supplement: MOESM2 [file 9492084]

# INTERVENTION IMPLEMENTATION

## RECRUITMENT

**YEAR 10 GIRLS**  
(Age 15-16yrs)  
n=31

**YEAR 7 GIRLS**  
(Age 12-13yrs)  
n=34

## Week 1

One day training  
n=8

Regular Sport Education  
Curriculum in class

## Week 2

**Assisted  
Implementation**  
d=65 minutes

**Blindfold  
'Challenge'**

**Assisted Implementation**  
n=8

**Participants** n=7

*Non- participants* n=1

*Due to external workplace  
experience*

**Participation in the GLAMA  
program**  
n=34

**Participants** n=28

*Non- participants* n=6

*Due to illness (3), absence  
from class (2), injury (1)*

## Week 3

**Unassisted  
Implementation**  
d=110minutes

**'Paper Race & Ball  
Challenges'  
implemented**

**Unassisted  
Implementation**  
n=8

**Participants** n=5

*Non- participants* n=3

*Due to external workplace  
experience, community  
leadership course, school  
athletics team*

**Participation in the GLAMA  
program**  
n=34

**Participants** n=31

*Non-participants* n=3

*Due to absence from  
class(2), injury (1)*

## Data Collection

Week 1: Leadership Training  
Evaluation (Q)

Week 2 & 3: Evaluation of  
Assisted and Unassisted  
Implementation (Q)

Verbal debrief & discussion of  
assisted implementation

Week 3: GLAMA program  
Evaluation (Q)

Week 3: GLAMA program  
evaluation (GR)

Note: d= duration of challenge; Q= Questionnaire; GR= group response
